# Supplementary material
Source: PubMed Central journal article supplement (PMC153725)
Supplement: plntcell_15_5_1186__1.pdf [file plntcell_15_5_1186__1.pdf]

## Supplementary material

Table S1. Genes and pseudogenes on the *T. monococcum* and *T. durum* contigs.

| Gene ID <sup>a</sup>      | <i>T. monococcum</i><br>(AY146588)                                             | <i>T. durum</i><br>(AY146587)                  | Predicted function <sup>b</sup>                                                                                                                                                                                                      | Supporting evidence <sup>c</sup>                                                                                                                                               |
|---------------------------|--------------------------------------------------------------------------------|------------------------------------------------|--------------------------------------------------------------------------------------------------------------------------------------------------------------------------------------------------------------------------------------|--------------------------------------------------------------------------------------------------------------------------------------------------------------------------------|
| 1 (-),<br>3 (-),<br>9 (-) | <i>TmGluA3-2</i><br>(266981-267264)<br><br><i>TmGluA3-3</i><br>(274690-274791) | <i>TdGluA3-1</i><br>(64353-65519)              | <u>TmGluA3-2</u> : LMW glutenin protein <i>T. aestivum</i> P93794 (E=e-53)<br><u>TmGluA3-3</u> : LMW glutenin protein <i>T. aestivum</i> P93794 (E=e-51)<br><u>TdGluA3-1</u> : LMW glutenin protein <i>T. durum</i> P16315 (E=4e-44) | <u>TmGluA3-2</u> : BU607215 <i>T. aestivum</i> (E=e-163)<br><u>TmGluA3-3</u> : BU607215 <i>T. aestivum</i> (E=e-151)<br><u>TdGluA3-1</u> : BF293077 <i>T. durum</i> (E=4e-177) |
| 2 (-)                     | <i>TmHG-1</i><br>(108502-110998)                                               | -                                              | Unknown protein                                                                                                                                                                                                                      | RiceGAAS annotation system, BE492296 <i>T. monococcum</i> (E=4e-40)                                                                                                            |
| 4 (+)                     | <i>TmHG-2</i><br>(269228-271588)                                               | -                                              | Unknown protein                                                                                                                                                                                                                      | RiceGAAS annotation system, BJ285833 <i>T. aestivum</i> (E=e-147)                                                                                                              |
| 5 (+)                     | <i>TmPIK-1</i> <sup>ψ</sup><br>(266981-267264, 274690-274791)                  | -                                              | 85% similarity to a soybean phosphatidyl-inositol 3-kinase from (amino acid positions 502–608) P42347 (E= 2e-9)                                                                                                                      | -                                                                                                                                                                              |
| 6 (+),14 (+)              | <i>TmRGL-1</i> <sup>ψ</sup><br>(276394-280055)                                 | <i>TdRGL-1</i><br>(140783-141799)              | <u>TmRGL-1</u> : Resistance complex protein I2C-2 <i>L. esculentum</i> O24016 (E=5e-68)<br><br><u>TdRGL-1</u> : A320-4 protein <i>O. sativa</i> Q9SXR0 (E=e-38)                                                                      | <u>TmRGL-1</u> : CA501286 <i>T. aestivum</i> (E=e-113)<br><br><u>TdRGL-1</u> : -                                                                                               |
| 7 (+)                     | <i>TmSTF-1</i><br>(284366-285442)                                              | -                                              | Sulfotransferase like gene <i>A. thaliana</i> Q9M1V2 (E=e-107)                                                                                                                                                                       | BE493623 <i>T. durum</i> (E=e-107)                                                                                                                                             |
| 8 (+)                     | -                                                                              | <i>TdHbox-1</i> <sup>ψ*</sup><br>(29674-29802) | Similarity with Glabra2 like-1 protein <i>A. thaliana</i> Q9LFW5 (E=5e-8)                                                                                                                                                            | -                                                                                                                                                                              |
| 10 (+)                    | -                                                                              | <i>TdLRR1</i> <sup>ψ</sup><br>(77451-78390)    | Similarity with Disease resistance protein like <i>A. thaliana</i> Q9FFS6 (E= 6 e-6)                                                                                                                                                 | BE591368 <i>T. aestivum</i> (E=e-168)                                                                                                                                          |
| 11 (+)                    | -                                                                              | <i>TdHG-1</i><br>(102386-105314)               | Unknown protein                                                                                                                                                                                                                      | RiceGAAS annotation system, BE497896 <i>T. aestivum</i> (E=6e-58)                                                                                                              |
| 12 (-)                    | -                                                                              | <i>TdHG-2</i><br>(107822-109161)               | Unknown protein                                                                                                                                                                                                                      | RiceGAAS annotation system, BQ788997 <i>T. aestivum</i> (E=2e-12)                                                                                                              |
| 13 (-)                    | -                                                                              | <i>TdHG-3</i><br>(109559-116377)               | Unknown protein                                                                                                                                                                                                                      | RiceGAAS annotation system, CA728026 <i>T. aestivum</i> (E=e-135)                                                                                                              |

<sup>a</sup> Genes and pseudogenes numbered as in Figure 3 and their strand orientation.

<sup>b</sup> Protein function is based on BLASTX searches. E value are given in parenthesis.

<sup>c</sup> Evidence supporting the existence of the gene : Identification of identical or similar sequence in *Triticeae* ESTs (E value are given in parenthesis) or prediction by the RiceGAAS annotation system (Sakata et al., 2002).

<sup>ψ</sup> Sequence determined as pseudogene.

\* *TdHbox-1* corresponds to a sequence of 111bp with 70% homology to the protein sequence encoded by the last exon of the *Glabra2* like-1 protein. It has been found inside a gypsy retrotransposon (Fatima\_107G22-2, Wicker et al., 2001). It is likely that it has been acquired by Fatima\_107G22-2. Acquisition of segments of cellular genes by LTR retrotransposons has been previously described (Jin and Bennetzen, 1994; Elrouby and Bureau, 2001).

**Table S2.** Chronology of retrotransposon insertions in the LMW *Glu-A3* region

| Element                 | bp aligned | Substitutions | MYA <sup>a</sup> | SD <sup>b</sup> |
|-------------------------|------------|---------------|------------------|-----------------|
| <i>WIS_426K20-1</i>     | 1713       | 22            | 0.99             | 0.21            |
| <i>Angela_426K20-4</i>  | 1715       | 45            | 2.05             | 0.31            |
| <i>WIS_107G22-2</i>     | 1440       | 39            | 2.12             | 0.34            |
| <i>Angela_107G22-1</i>  | 1731       | 60            | 2.73             | 0.36            |
| <i>Angela_426K20-5</i>  | 1730       | 65            | 2.97             | 0.37            |
| <i>WIS_107G22-1</i>     | 1718       | 69            | 3.18             | 0.39            |
| <i>Sabrina_107G22-3</i> | 1216       | 55            | 3.60             | 0.49            |
| <i>WHAM-1_453N11-1</i>  | 1324       | 65            | 3.92             | 0.49            |
| <i>Sabrina_18B1-2</i>   | 1556       | 80            | 4.10             | 0.46            |
| <i>Sabrina_453N11-2</i> | 1564       | 97            | 4.98             | 0.51            |
| <i>Wilma_426K20-3</i>   | 1386       | 94            | 5.49             | 0.57            |
